# Supplementary material for: Phthalate exposure and reproductive hormones and sex-hormone binding globulin before puberty – Phthalate contaminated-foodstuff episode in Taiwan
Source: PubMed Central journal article supplement (PMC5391940; doi:10.1371/journal.pone.0175536), 2017-04-14
Supplement: pone.0175536.s001.pdf [file pone.0175536.s001.pdf]

**S1 Table. Spearman correlation between covariables, DEHP exposure, and reproductive hormones**

|                                               | All (n = 222)         |                     |                       |                     | Boys (n = 132)        |                     |                       |                     | Girls (n =90)         |                     |                       |                    |
|-----------------------------------------------|-----------------------|---------------------|-----------------------|---------------------|-----------------------|---------------------|-----------------------|---------------------|-----------------------|---------------------|-----------------------|--------------------|
|                                               | Age                   | Gestational<br>week | BMI                   | Birth<br>weight     | Age                   | Gestational<br>week | BMI                   | Birth<br>weight     | Age                   | Gestational<br>week | BMI                   | Birth<br>weight    |
| Urinary DEHP monoesters (µg/g creatinine)     |                       |                     |                       |                     |                       |                     |                       |                     |                       |                     |                       |                    |
| MEHP                                          | 0.025                 | -0.053              | 0.0001                | -0.07               | 0.046                 | -0.07               | -0.0032               | -0.125              | 0.053                 | -0.012              | -0.001                | -0.01              |
| MEHHP                                         | -0.306 <sup>***</sup> | -0.003              | -0.034                | 0.033               | -0.220 <sup>*</sup>   | -0.04               | -0.019                | 0.06                | -0.409 <sup>***</sup> | 0.099               | -0.084                | -0.029             |
| MEOHP                                         | -0.293 <sup>***</sup> | 0.016               | -0.05                 | 0.024               | -0.222 <sup>*</sup>   | -0.01               | 0.004                 | 0.045               | -0.345 <sup>**</sup>  | 0.096               | -0.15                 | -0.028             |
| ∑MEHP                                         | -0.285 <sup>***</sup> | 0.004               | -0.03                 | 0.018               | -0.215 <sup>*</sup>   | -0.012              | -0.0001               | 0.033               | -0.335 <sup>**</sup>  | 0.106               | -0.119                | -0.023             |
| Estimated DEHP exposure levels (µg/kg bw/day) |                       |                     |                       |                     |                       |                     |                       |                     |                       |                     |                       |                    |
| AvDI <sub>all</sub>                           | -0.338 <sup>***</sup> | 0.013               | -0.321 <sup>***</sup> | -0.142 <sup>*</sup> | -0.348 <sup>***</sup> | 0.05                | -0.305 <sup>***</sup> | -0.146 <sup>#</sup> | -0.315 <sup>**</sup>  | -0.039              | -0.351 <sup>***</sup> | -0.137             |
| AvDI <sub>all_wp</sub>                        | -0.231 <sup>***</sup> | 0.012               | -0.304 <sup>***</sup> | -0.137 <sup>*</sup> | -0.192 <sup>*</sup>   | 0.055               | -0.249 <sup>**</sup>  | -0.162 <sup>#</sup> | -0.309 <sup>**</sup>  | -0.05               | -0.377 <sup>***</sup> | -0.113             |
| Reproductive hormones                         |                       |                     |                       |                     |                       |                     |                       |                     |                       |                     |                       |                    |
| LH (mIU/mL)                                   | 0.289 <sup>***</sup>  | -0.041              | 0.0644                | 0.056               | 0.208 <sup>*</sup>    | -0.028              | 0.034                 | 0.013               | 0.473 <sup>***</sup>  | -0.065              | 0.107                 | 0.138              |
| FSH(mIU/mL)                                   | 0.197 <sup>**</sup>   | -0.001              | 0.083                 | -0.006              | 0.212 <sup>*</sup>    | -0.101              | 0.14                  | -0.008              | 0.061                 | 0.13                | 0.1                   | 0.137              |
| E2 (pg/mL)                                    | 0.124 <sup>#</sup>    | 0.099               | 0.059                 | 0.01                | 0.086                 | 0.083               | 0.020                 | -0.003              | 0.149                 | 0.114               | 0.094                 | 0.053              |
| TT (ng/dL)                                    | 0.360 <sup>***</sup>  | 0.074               | 0.201 <sup>**</sup>   | 0.09                | 0.330 <sup>***</sup>  | 0.074               | 0.182 <sup>*</sup>    | 0.023               | 0.392 <sup>***</sup>  | 0.069               | 0.234 <sup>*</sup>    | 0.189 <sup>#</sup> |
| Free TT (ng/dL)                               | 0.434 <sup>***</sup>  | 0.116 <sup>#</sup>  | 0.317 <sup>***</sup>  | 0.054               | 0.439 <sup>***</sup>  | 0.208 <sup>*</sup>  | 0.247 <sup>**</sup>   | 0.059               | 0.403 <sup>***</sup>  | -0.043              | 0.471 <sup>***</sup>  | 0.091              |
| SHBG (nmol/L)                                 | -0.448 <sup>***</sup> | -0.075              | -0.348 <sup>***</sup> | -0.002              | -0.468 <sup>***</sup> | -0.187 <sup>*</sup> | -0.293 <sup>**</sup>  | -0.023              | -0.407 <sup>***</sup> | 0.13                | -0.458 <sup>***</sup> | 0.021              |

<sup>#</sup> $p < 0.1$ ,  $*$  $p < 0.05$ ,  $**$  $p < 0.01$ ,  $***$  $p < 0.001$ .
