# Supplementary material for: Phthalate exposure and reproductive hormones and sex-hormone binding globulin before puberty – Phthalate contaminated-foodstuff episode in Taiwan
Source: PubMed Central journal article supplement (PMC5391940; doi:10.1371/journal.pone.0175536), 2017-04-14
Supplement: pone.0175536.s003.pdf [file pone.0175536.s003.pdf]

**S3 Table. The relationship between urinary DEHP monoester and reproductive hormone concentration in children (n = 222)**

| Urinary DEHP<br>monoesters (µg/L) | LH (mIU/mL)       |                  | FSH (mIU/mL)         |                  | E2 (pg/mL)        |                  |
|-----------------------------------|-------------------|------------------|----------------------|------------------|-------------------|------------------|
|                                   | n (%) of<br>> LOD | AOR <sup>¶</sup> | n (%) of<br>> median | AOR <sup>¶</sup> | n (%) of<br>> LOD | AOR <sup>¶</sup> |
| <b>Boys (n = 132)</b>             |                   |                  |                      |                  |                   |                  |
| <b>MEHP</b>                       |                   |                  |                      |                  |                   |                  |
| <4.87 (n = 63)                    | 17 (27.0)         | Reference        | 25 (39.7)            | Reference        | 23 (36.5)         | Reference        |
| ≥4.87 (n = 69)                    | 14 (20.3)         | 0.50 (0.17–1.45) | 39 (56.5)            | 0.91 (0.36–2.25) | 12 (17.4)         | 0.45 (0.16–1.19) |
| <b>MEHHP</b>                      |                   |                  |                      |                  |                   |                  |
| <20.97 (n = 62)                   | 16 (25.8)         | Reference        | 25 (40.3)            | Reference        | 20 (32.3)         | Reference        |
| ≥20.97 (n = 70)                   | 15 (21.4)         | 0.70 (0.22–2.21) | 39 (55.7)            | 0.74 (0.28–1.95) | 15 (21.4)         | 0.97 (0.34–2.80) |
| <b>MEOHP</b>                      |                   |                  |                      |                  |                   |                  |
| <15.19 (n = 63)                   | 16 (25.4)         | Reference        | 24 (38.1)            | Reference        | 22 (34.9)         | Reference        |
| ≥15.19 (n = 69)                   | 15 (21.7)         | 0.75 (0.25–2.29) | 40 (58.0)            | 1.10 (0.43–2.81) | 13 (18.8)         | 0.58 (0.21–1.62) |
| <b>∑MEHP</b>                      |                   |                  |                      |                  |                   |                  |
| <41.95 (n = 61)                   | 16 (26.2)         | Reference        | 22 (36.1)            | Reference        | 22 (36.1)         | Reference        |
| ≥41.95 (n = 71)                   | 15 (21.1)         | 0.66 (0.21–2.09) | 42 (59.2)            | 1.41 (0.53–3.72) | 13 (18.3)         | 0.52 (0.18–1.46) |
| <b>Girls (n = 90)</b>             |                   |                  |                      |                  |                   |                  |
| <b>MEHP</b>                       |                   |                  |                      |                  |                   |                  |
| <4.87 (n = 48)                    | 5 (10.4)          | Reference        | 18 (37.5)            | Reference        | 20 (41.7)         | Reference        |

|                 |          |                   |           |                        |           |                    |
|-----------------|----------|-------------------|-----------|------------------------|-----------|--------------------|
| ≥4.87 (n = 42)  | 8 (19.1) | 3.10 (0.40–30.59) | 25 (59.5) | 3.81 (1.36–11.63)*     | 20 (47.6) | 1.64 (0.58–4.74)   |
| <b>MEHHP</b>    |          |                   |           |                        |           |                    |
| <20.97 (n = 49) | 4 (8.2)  | Reference         | 17 (34.7) | Reference              | 19 (38.8) | Reference          |
| ≥20.97(n = 41)  | 9 (22.0) | 4.90 (0.53–59.68) | 26 (63.4) | 8.51 (2.21–39.01)**    | 21 (51.2) | 2.39 (0.68–9.19)   |
| <b>MEOHP</b>    |          |                   |           |                        |           |                    |
| <15.19 (n = 48) | 4 (4.4)  | Reference         | 15 (31.3) | Reference              | 19 (39.6) | Reference          |
| ≥15.19 (n = 42) | 9 (21.4) | 4.05 (0.46–43.12) | 28 (66.7) | 20.10 (4.84–109.05)*** | 21 (50.0) | 2.28 (0.69–8.05)   |
| <b>∑MEHP</b>    |          |                   |           |                        |           |                    |
| <41.95 (n = 50) | 4 (8.0)  | Reference         | 17 (34.0) | Reference              | 19 (38.0) | Reference          |
| ≥41.95 (n = 40) | 9 (22.5) | 5.10 (0.60–55.45) | 26 (65.0) | 10.54 (2.85–47.48)***  | 21 (52.5) | 3.28 (0.98–12.17)# |

All concentrations of urinary DEHP monoesters and reproductive hormones were log 10 transformed.

#p < 0.1, \*p < 0.05, \*\*p < 0.01, \*\*\*p < 0.001.

¶Adjusted for age, birth weight, and urinary creatinine concentration.

Some numbers do not add up to total n because of missing values.

Abbreviations: DEHP, di-(2-ethylhexyl) phthalate; MEHP, mono-(2-ethylhexyl) phthalate; MEHHP, mono-(2-ethyl-5-hydroxyhexyl) phthalate; MEOHP, mono-(2-ethyl-5-oxohexyl) phthalate; LH, luteinizing hormone; FSH, follicle-stimulating hormone; E2, estradiol; AOR, adjusted odds ratio; LOD, limit of detection value.

**S3 Table (continued).** The relationship between urinary DEHP monoester and reproductive hormone concentration in children (n = 222).

| Urinary DEHP<br>monoesters ( $\mu\text{g/L}$ ) | TT (ng/dL)        |                   | Free TT (ng/dL)      |                  | SHBG (nmol/L)        |                  |
|------------------------------------------------|-------------------|-------------------|----------------------|------------------|----------------------|------------------|
|                                                | n (%) of<br>> LOD | AOR <sup>¶</sup>  | n (%) of<br>> median | AOR <sup>¶</sup> | n (%) of<br>> median | AOR <sup>¶</sup> |
| <b>Boys (n = 132)</b>                          |                   |                   |                      |                  |                      |                  |
| <b>MEHP</b>                                    |                   |                   |                      |                  |                      |                  |
| <4.87 (n = 63)                                 | 5 (7.9)           | Reference         | 26 (41.3)            | Reference        | 36 (57.1)            | Reference        |
| $\geq$ 4.87 (n = 69)                           | 7 (10.1)          | 1.94 (0.32–14.17) | 36 (52.2)            | 1.17 (0.47–2.89) | 30 (43.5)            | 1.08 (0.44–2.72) |
| <b>MEHHP</b>                                   |                   |                   |                      |                  |                      |                  |
| <20.97 (n = 62)                                | 7 (11.3)          | Reference         | 25 (40.3)            | Reference        | 37 (59.7)            | Reference        |
| $\geq$ 20.97 (n = 70)                          | 5 (7.1)           | 0.60 (0.08–4.40)  | 37 (52.9)            | 1.46 (0.56–3.90) | 29 (41.4)            | 0.77 (0.29–2.01) |
| <b>MEOHP</b>                                   |                   |                   |                      |                  |                      |                  |
| <15.19 (n = 63)                                | 6 (9.5)           | Reference         | 26 (41.3)            | Reference        | 37 (58.7)            | Reference        |
| $\geq$ 15.19 (n = 69)                          | 6 (8.7)           | 1.49 (0.23–11.31) | 36 (52.2)            | 1.21 (0.47–3.12) | 29 (42.0)            | 0.90 (0.35–2.32) |
| <b><math>\Sigma</math>MEHP</b>                 |                   |                   |                      |                  |                      |                  |
| <41.95 (n = 61)                                | 6 (9.8)           | Reference         | 26 (42.6)            | Reference        | 35 (57.4)            | Reference        |
| $\geq$ 41.95 (n = 71)                          | 6 (8.5)           | 1.53 (0.21–12.25) | 36 (50.7)            | 1.02 (0.39–2.71) | 31 (43.7)            | 1.11 (0.42–2.96) |
| <b>Girls (n = 90)</b>                          |                   |                   |                      |                  |                      |                  |
| <b>MEHP</b>                                    |                   |                   |                      |                  |                      |                  |
| <4.87 (n = 48)                                 | 9 (18.8)          | Reference         | 21 (43.8)            | Reference        | 25 (52.1)            | Reference        |

|                 |          |                   |           |                  |           |                                |
|-----------------|----------|-------------------|-----------|------------------|-----------|--------------------------------|
| ≥4.87 (n = 42)  | 6 (14.3) | 0.93 (0.16–5.27)  | 23 (54.8) | 1.00 (0.35–2.79) | 20 (47.6) | 1.31 (0.47–3.80)               |
| <b>MEHHP</b>    |          |                   |           |                  |           |                                |
| <20.97 (n = 49) | 7 (14.3) | Reference         | 20 (40.8) | Reference        | 25 (51.0) | Reference                      |
| ≥20.97 (n = 41) | 8 (19.5) | 3.76 (0.54–32.74) | 24 (58.5) | 1.37 (0.39–4.88) | 20 (48.8) | 2.17 (0.61–8.27)               |
| <b>MEOHP</b>    |          |                   |           |                  |           |                                |
| <15.19 (n = 48) | 8 (16.7) | Reference         | 20 (41.7) | Reference        | 24 (50.0) | Reference                      |
| ≥15.19 (n = 42) | 7 (16.7) | 1.19 (0.18–7.58)  | 24 (57.1) | 1.04 (0.31–3.40) | 21 (50.0) | 2.78 (0.83–10.18) <sup>#</sup> |
| <b>ΣMEHP</b>    |          |                   |           |                  |           |                                |
| <41.95 (n = 50) | 8 (16.0) | Reference         | 22 (44.0) | Reference        | 24 (48.0) | Reference                      |
| ≥41.95 (n = 40) | 7 (17.5) | 1.44 (0.23–9.16)  | 22 (55.0) | 0.74 (0.22–2.44) | 21 (52.5) | 3.85 (1.11–15.03) <sup>*</sup> |

All concentrations of urinary DEHP monoesters and reproductive hormones were log 10 transformed.

<sup>#</sup>p < 0.1, \*p < 0.05, \*\*p < 0.01, \*\*\*p < 0.001.

¶Adjusted for age, birth weight, and urinary creatinine concentration.

Some numbers do not add up to total n because of missing values.

Abbreviation: DEHP, di-(2-ethylhexyl) phthalate; MEHP, mono-(2-ethylhexyl) phthalate; MEHHP, mono-(2-ethyl-5-hydroxyhexyl) phthalate; MEOHP, mono-(2-ethyl-5-oxohexyl) phthalate; TT, testosterone; SHBG, sex hormone-binding globulin; AOR, adjusted odds ratio; LOD, limit of detection value.
